# Supplementary material
Source: PubMed Central journal article supplement (PMC9110014)
Supplement: mmc1.pdf [file mmc1.pdf]

# THE LANCET

## Digital Health

### Supplementary appendix

This appendix formed part of the original submission and has been peer reviewed.  
We post it as supplied by the authors.

Supplement to: Pfaff ER, Girvin AT, Bennett TD, et al. Identifying who has long COVID in the USA: a machine learning approach using N3C data. *Lancet Digit Health* 2022; published online May 16. [https://doi.org/10.1016/S2589-7500\(22\)00048-6](https://doi.org/10.1016/S2589-7500(22)00048-6).

# Supplemental Material

## Contents

|                                                                 |    |
|-----------------------------------------------------------------|----|
| Supplemental Figure 1: Cohort Selection Flow Diagram.....       | 2  |
| Supplemental Methods .....                                      | 3  |
| Supplemental Table 1: Training and Test Set Patient Counts..... | 6  |
| Supplemental Table 2: Top 50 Features in Each Model.....        | 7  |
| N3C Data Partners.....                                          | 10 |
| Ethics and Regulatory.....                                      | 12 |

# Supplemental Figure 1: Cohort Selection Flow Diagram

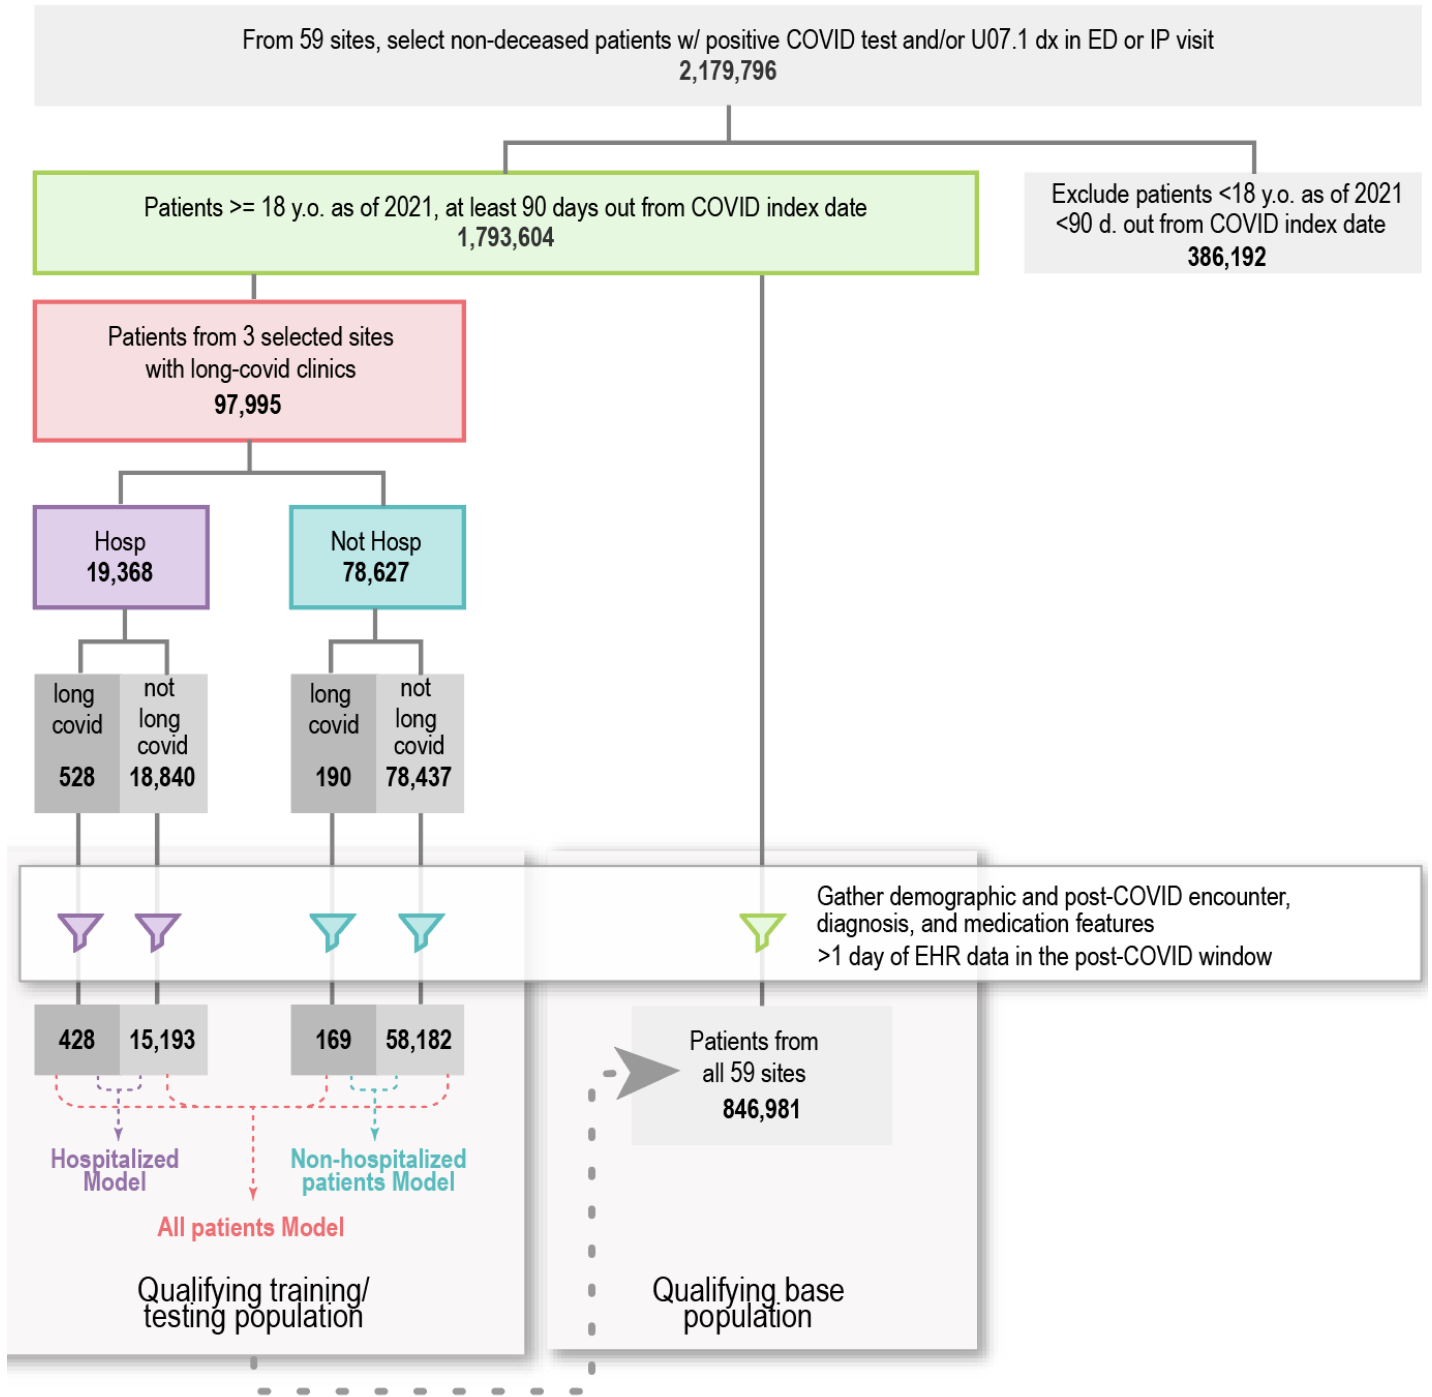

# Supplemental Methods

## Feature Engineering

The feature tables used as inputs for each model are made up of patient age, sex, healthcare utilization metrics, pre-COVID-19 comorbidities, post-COVID-19 diagnoses, and post-COVID-19 medications. Curation methods for each of these domains are described here. All OMOP concept sets and feature engineering code described here are available at <https://github.com/NCTraCSIDSci/n3c-longcovid> or by author request via the N3C Enclave, according to the N3C governance and regulatory policies.

### Healthcare utilization metrics

In order to calculate a utilization metric for each patient, we first determine the number of days in each patient's post-COVID-19 "window." By our definition, this window begins 45 days after the patient's COVID-19 index date and ends 320 days later, for a total of 365 days after the COVID-19 index date. Thus, every patient has a window of 320 days (though the dates differ for each patient, based on their COVID-19 index dates). The exception to this is the long-COVID clinic patients used to train the model; their post-COVID-19 window ends on the day before their first long-COVID clinic visit date, as supplied by the three sites.

Outpatient utilization ratios for each patient are calculated as:

$$\frac{(\# \text{ unique calendar days patient has an outpatient encounter in the post-COVID-19 window})}{(\# \text{ days in the patient's post-COVID-19 window})}$$

Inpatient utilization ratios for each patient are calculated as:

$$\frac{(\text{sum of lengths of stay for all inpatient visits in the post-COVID-19 window})}{(\# \text{ days in the patient's post-COVID-19 window})}$$

### Pre-COVID-19 comorbidities

We added indicator variables to flag whether each patient had one or more of the following comorbidities *prior* to their COVID-19 index date: diabetes, chronic kidney disease, congestive heart failure, chronic pulmonary disease. A patient was flagged as having one of these comorbidities if they had a diagnosis code for that condition on two or more occasions (distinct calendar days) prior to their COVID-19 index date.

### Post-COVID-19 diagnoses

The OMOP data model uses SNOMED CT as a standard vocabulary for diagnoses. SNOMED CT is multi-hierarchical, meaning that a single child concept can have many parent concepts. Here, we "rolled up" SNOMED-coded diagnoses to parent-level features for use in our ML models. Because the various levels of the SNOMED hierarchy are not consistent in granularity, automated roll up can lead to uninformative terms that are not useful model features (e.g. "disorder of body system"), and these uninformative concepts can appear as model features if enough of their child concepts have some importance in classification.

Informative terms that should be included based on clinical relevance are sometimes present at the same hierarchical level as these less informative terms. It is therefore not possible to roll up all SNOMED terms using a specific hierarchical level (i.e., roll up diagnoses to the fourth level down from the root). We therefore devised a computational approach to rolling up terms that lessens uninformative terms. A summary of the approach follows:

- Extract a dataset of all SNOMED CT child terms (i.e., the diagnosis terms used in the patient data) matched with two levels of parent terms (i.e., the child term's parent(s) and the parent(s)' parent(s)).
- Exclude the following parent concepts entirely, due to non-informativeness: "105721009 - General problem AND/OR complaint," "64572001 - Disease," "363296001 - Sequelae of disorders classified by disorder-system," "362977000 - Sequela," "58184002 - Recurrent disease," "55607006 - Problem,"

“2704003 - Acute disease,” “27624003 - Chronic disease,” “116223007 - Complication.” Child conditions that roll up to these parent terms remain in the data, but will not roll up to one of these terms.

- Exclude parent terms that contain the words “right” or “left”, which enables all child terms that specify laterality to be rolled up to a non-lateral parent.
- Exclude parent terms that contain the words “finding,” “disorder of,” or “by site” (which are generally generic, low-information terms), *unless* removal of the parent term would leave a child term without a viable parent term.
- Use the remaining set of parent terms in place of the child terms in the model.

Despite this computational pruning, there is still some concept duplication within our ML model because closely related concepts (which may be equivalent by some definitions) can exist in different branches of the hierarchy (e.g. “dyspnea” and “difficulty breathing”). These are inherent caveats of using ontologies and can be addressed through manual curation for future studies.

For each patient, we only counted conditions that newly occurred or occurred in greater frequency in the post-COVID-19 period compared to the pre-COVID-19 period. Finally, before running the model, we limited diagnosis features to those that were associated with at least 1% of the patients in our three-site subset. We first ran the model without this restriction to ensure this would not affect model performance, and noted our results were the same. We thus opted to add this restriction in order to render our models less computationally intensive.

## Post-COVID-19 medications

As with diagnoses, we rolled up medication records to parent-level concepts in order to collapse related terms into single features. We used the OMOP vocabulary to roll up all medication records to the “ingredient” level. As shown in the example below, these roll-ups enable us to combine multiple forms of the same drug into a single term for modelling purposes. Combination drugs separately roll up to each of their ingredients, also shown below.

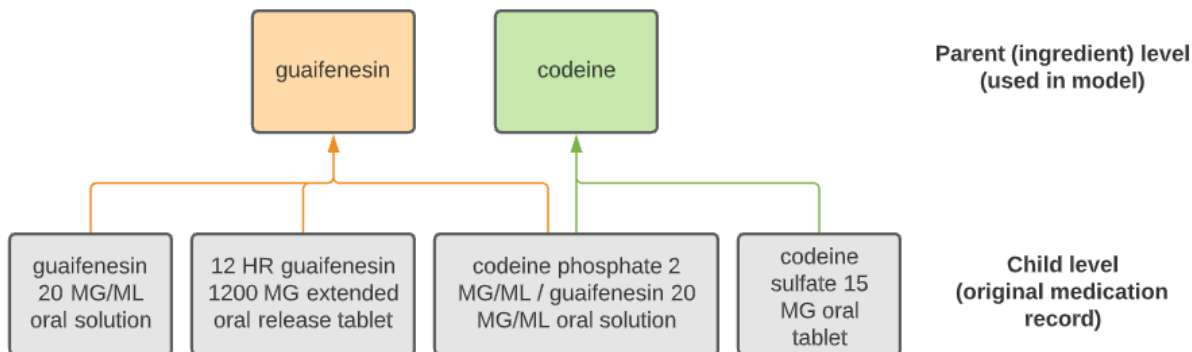

For each patient, we only counted medications that were newly prescribed in the post-COVID-19 period, with no records in the pre-COVID-19 period. Finally, before running the model, we limited medication features to those that were associated with at least 1% of the patients in our three-site subset. We first ran the model without this restriction to ensure this would not affect model performance, and noted our results were the same. We thus opted to add this restriction in order to render our models less computationally intensive.

## Clinic Referral Practices

Though our IRB protocol does not enable us to identify the clinics that provided our long-COVID clinic patients, we can provide descriptions of each clinic’s referral practices. We took this information into account when building our models, as practice differ among the three sites. However, the practices are similar enough to make them comparable.

| Site | Referral Practice                                                                                                                                                                          |
|------|--------------------------------------------------------------------------------------------------------------------------------------------------------------------------------------------|
| 1    | Requires a physician referral. Accepts patients without a positive test, but asks the referring physician to explain why they suspect COVID-19 infection.                                  |
| 2    | Requires a physician referral. Requests that patients have a positive test result on record.                                                                                               |
| 3    | Requires a physician referral. Testing requirements have changed over time. A record of a positive test was not required until approximately June 2021, at which point it became required. |

## Model Details

XGBClassifier models were trained using the python package XGBoost ([https://xgboost.readthedocs.io/en/stable/python/python\\_api.html](https://xgboost.readthedocs.io/en/stable/python/python_api.html)).

The following hyperparameters, selected with scikit-learn GridSearchCV, were used:

**All Patients Model:** colsample\_bytree=0.1, gamma=0.4, learning\_rate=0.09, max\_depth=8, min\_child\_weight=0, n\_estimators=400, subsample=0.9, random\_state=42

**Hospitalized Patients Model:** colsample\_bytree=0.2, gamma=0, learning\_rate=0.1, max\_depth=4, min\_child\_weight=0, n\_estimators=100, subsample=0.6, random\_state=42

**Not Hospitalized Patients Model:** colsample\_bytree=0.4, gamma=0.5, learning\_rate=0.01, random\_state=42, subsample=1

All code used to define our cohort, build our models, and create the figures in this paper is open source and available at <https://github.com/NCTraCSIDSci/n3c-longcovid>.

## Supplemental Table 1: Training and Test Set Patient Counts

| Model            | Patient subset   | Training                   |                | Testing                    |                |
|------------------|------------------|----------------------------|----------------|----------------------------|----------------|
|                  |                  | Long-COVID Clinic Patients | Not Long-COVID | Long-COVID Clinic Patients | Not Long-COVID |
| All patients     | Hospitalized     | 327                        | 360            | 101                        | 76             |
|                  | Not hospitalized | 125                        | 134            | 44                         | 45             |
| Hospitalized     | Hospitalized     | 327                        | 360            | 101                        | 76             |
| Not-Hospitalized | Not hospitalized | 125                        | 134            | 44                         | 45             |

## Supplemental Table 2: Top 50 features in each model

The importance score for each feature is the sum of the importance of that feature for each patient. Mean values are the mean value of each feature across each group. All diagnosis and medication features are binary (1=yes, 0=no). For diagnoses, “yes” means that the patient had a greater number of occurrences of that diagnosis code in their post-COVID-19 window than their pre-COVID-19 window. For medications, “yes” means that the patient had one or more prescriptions for that medication in their post-COVID-19 window, and no record of that medication in their pre-COVID-19 window. Post-COVID-19 outpatient and inpatient utilization and age are continuous variables.

**Table 2a. Top 50 all-patients model features, ranked by importance (SHAP value).**

| Feature                               | Importance | Mean Values    |                      |
|---------------------------------------|------------|----------------|----------------------|
|                                       |            | Not Long-COVID | Predicted Long-COVID |
| post-COVID-19 outpatient utilization  | 1,250.91   | 0.03           | 0.09                 |
| age                                   | 353.85     | 52.04          | 55.27                |
| post-COVID-19 inpatient utilization   | 254.54     | 0.01           | 0.01                 |
| COVID-19 vaccine (med)                | 144.05     | 0.15           | 0.05                 |
| dyspnea (dx)                          | 139.28     | 0.08           | 0.21                 |
| male sex                              | 115.59     | 0.45           | 0.38                 |
| difficulty breathing (dx)             | 113.86     | 0.08           | 0.21                 |
| preexisting diabetes                  | 89.02      | 0.12           | 0.17                 |
| albuterol (med)                       | 79.19      | 0.07           | 0.12                 |
| dexamethasone (med)                   | 75.89      | 0.11           | 0.04                 |
| metoprolol (med)                      | 66.24      | 0.03           | 0.08                 |
| preexisting chronic kidney disease    | 62.61      | 0.08           | 0.12                 |
| melatonin (med)                       | 53.18      | 0.06           | 0.10                 |
| hospitalized for COVID-19             | 50.27      | 0.73           | 0.72                 |
| hyperlipidemia (dx)                   | 49.16      | 0.11           | 0.04                 |
| naloxone (med)                        | 43.07      | 0.08           | 0.02                 |
| polyethylene glycol 3350 (med)        | 42.22      | 0.05           | 0.10                 |
| backache (dx)                         | 42.01      | 0.06           | 0.02                 |
| preexisting chronic pulmonary disease | 39.64      | 0.08           | 0.12                 |
| propofol (med)                        | 38.14      | 0.09           | 0.04                 |
| increased lipids (dx)                 | 34.36      | 0.10           | 0.04                 |
| triamcinolone (med)                   | 34.15      | 0.04           | 0.02                 |
| heart failure (dx)                    | 30.77      | 0.04           | 0.01                 |
| ibuprofen (med)                       | 30.04      | 0.07           | 0.03                 |
| mixed hyperlipidemia (dx)             | 27.28      | 0.04           | 0.01                 |
| sennosides USP (med)                  | 24.99      | 0.06           | 0.09                 |
| low back pain (dx)                    | 24.87      | 0.05           | 0.01                 |
| nausea (dx)                           | 24.17      | 0.04           | 0.02                 |
| cough (dx)                            | 23.62      | 0.04           | 0.06                 |
| preexisting congestive heart failure  | 22.66      | 0.06           | 0.08                 |
| malaise (dx)                          | 22.37      | 0.01           | 0.05                 |
| guaifenesin (med)                     | 20.25      | 0.03           | 0.07                 |
| salmeterol (med)                      | 19.52      | 0.01           | 0.03                 |
| aspirin (med)                         | 18.99      | 0.05           | 0.04                 |
| soft tissue lesion (dx)               | 18.37      | 0.04           | 0.02                 |
| pain of truncal structure (dx)        | 18.32      | 0.12           | 0.08                 |
| pain (dx)                             | 17.85      | 0.09           | 0.04                 |
| clinical finding (dx)                 | 17.41      | 0.02           | 0.04                 |
| abdominal pain (dx)                   | 16.80      | 0.05           | 0.01                 |
| acute respiratory disease (dx)        | 16.74      | 0.05           | 0.03                 |
| joint pain (dx)                       | 15.65      | 0.04           | 0.01                 |
| renal failure syndrome (dx)           | 15.60      | 0.04           | 0.01                 |
| dyssomnia (dx)                        | 15.07      | 0.02           | 0.03                 |
| amoxicillin (med)                     | 14.72      | 0.04           | 0.02                 |
| hydralazine (med)                     | 14.29      | 0.03           | 0.03                 |
| asthenia (dx)                         | 14.03      | 0.04           | 0.03                 |
| diphenhydramine (med)                 | 13.59      | 0.09           | 0.04                 |
| chest pain (dx)                       | 13.41      | 0.05           | 0.07                 |
| tramadol (med)                        | 13.15      | 0.06           | 0.02                 |
| hypertensive disorder (dx)            | 13.12      | 0.12           | 0.08                 |



**Table 2b. Top 50 non-hospitalized model features, ranked by importance (SHAP value)**

| Feature                                            | Importance | Mean Values    |                      |
|----------------------------------------------------|------------|----------------|----------------------|
|                                                    |            | Not Long-COVID | Predicted Long-COVID |
| post-COVID-19 outpatient utilization               | 77.58      | 0.02           | 0.07                 |
| difficulty breathing (dx)                          | 25.95      | 0.04           | 0.29                 |
| age                                                | 18.26      | 41.94          | 48.46                |
| dyspnea (dx)                                       | 14.01      | 0.04           | 0.29                 |
| male sex                                           | 11.26      | 0.37           | 0.24                 |
| COVID-19 vaccine (med)                             | 9.72       | 0.22           | 0.08                 |
| post-COVID-19 inpatient utilization                | 2.27       | 0.00           | 0.00                 |
| oxycodone (med)                                    | 2.02       | 0.10           | 0.04                 |
| cough (dx)                                         | 1.72       | 0.01           | 0.10                 |
| prednisone (med)                                   | 1.41       | 0.04           | 0.04                 |
| arthralgia of the pelvic region and thigh (dx)     | 1.36       | 0.06           | 0.03                 |
| deficiency of micronutrients (dx)                  | 1.18       | 0.01           | 0.03                 |
| polyethylene glycol 3350                           | 1.18       | 0.04           | 0.02                 |
| albuterol (med)                                    | 1.12       | 0.02           | 0.13                 |
| dyssomnia (dx)                                     | 1.02       | 0.01           | 0.06                 |
| preexisting chronic pulmonary disease              | 1.02       | 0.05           | 0.16                 |
| ketorolac (med)                                    | 0.83       | 0.07           | 0.04                 |
| flumazenil (med)                                   | 0.76       | 0.06           | 0.01                 |
| vitamin D deficiency (dx)                          | 0.67       | 0.01           | 0.03                 |
| metabolic disease (dx)                             | 0.57       | 0.00           | 0.08                 |
| vitamin deficiency (dx)                            | 0.50       | 0.01           | 0.03                 |
| hypoxemia (dx)                                     | 0.47       | 0.00           | 0.08                 |
| promethazine (med)                                 | 0.34       | 0.05           | 0.01                 |
| heart disease (dx)                                 | 0.31       | 0.01           | 0.03                 |
| vitamin disease (dx)                               | 0.29       | 0.01           | 0.03                 |
| gabapentin (med)                                   | 0.29       | 0.03           | 0.05                 |
| clinical finding (dx)                              | 0.28       | 0.00           | 0.06                 |
| diphenhydramine (med)                              | 0.28       | 0.07           | 0.04                 |
| ibuprofen (med)                                    | 0.21       | 0.07           | 0.03                 |
| hydromorphone (med)                                | 0.19       | 0.07           | 0.02                 |
| inflammation of specific body organs (dx)          | 0.17       | 0.07           | 0.06                 |
| benzocaine (med)                                   | 0.17       | 0.06           | 0.02                 |
| asthma (dx)                                        | 0.17       | 0.04           | 0.05                 |
| disorders of initiating and maintaining sleep (dx) | 0.17       | 0.01           | 0.06                 |
| sleep disorder (dx)                                | 0.15       | 0.04           | 0.10                 |
| hyperlipidemia (dx)                                | 0.14       | 0.04           | 0.04                 |
| increased lipids (dx)                              | 0.14       | 0.04           | 0.03                 |
| phenylephrine (med)                                | 0.12       | 0.06           | 0.02                 |
| amoxicillin (med)                                  | 0.12       | 0.05           | 0.02                 |
| famotidine (med)                                   | 0.09       | 0.04           | 0.02                 |
| iohexol (med)                                      | 0.09       | 0.00           | 0.04                 |
| knee pain (dx)                                     | 0.08       | 0.04           | 0.00                 |
| chest pain (dx)                                    | 0.08       | 0.06           | 0.11                 |
| fentanyl (med)                                     | 0.07       | 0.07           | 0.06                 |
| pain of truncal structure (dx)                     | 0.07       | 0.10           | 0.12                 |
| lactate (med)                                      | 0.07       | 0.09           | 0.05                 |
| muscle strain (dx)                                 | 0.00       | 0.01           | 0.01                 |
| musculoskeletal chest pain (dx)                    | 0.00       | 0.02           | 0.00                 |
| muscle weakness (dx)                               | 0.00       | 0.00           | 0.02                 |
| musculoskeletal finding (dx)                       | 0.00       | 0.00           | 0.04                 |

**Table 2c. Top 50 hospitalized model features, ranked by importance (SHAP value)**

| Feature                                                          | Importance | Mean Values    |                      |
|------------------------------------------------------------------|------------|----------------|----------------------|
|                                                                  |            | Not Long-COVID | Predicted Long-COVID |
| post-COVID-19 outpatient utilization                             | 744.99     | 0.03           | 0.10                 |
| post-COVID-19 inpatient utilization                              | 161.05     | 0.01           | 0.01                 |
| age                                                              | 159.54     | 55.80          | 57.87                |
| COVID-19 vaccine (med)                                           | 54.84      | 0.12           | 0.04                 |
| dyspnea (dx)                                                     | 51.04      | 0.09           | 0.18                 |
| dexamethasone (med)                                              | 48.34      | 0.12           | 0.03                 |
| hyperlipidemia (dx)                                              | 42.22      | 0.13           | 0.04                 |
| pain of truncal structure (dx)                                   | 41.66      | 0.12           | 0.06                 |
| difficulty breathing (dx)                                        | 41.49      | 0.09           | 0.18                 |
| preexisting diabetes                                             | 29.49      | 0.14           | 0.19                 |
| metoprolol (med)                                                 | 28.42      | 0.04           | 0.09                 |
| preexisting chronic kidney disease                               | 28.32      | 0.10           | 0.16                 |
| albuterol (med)                                                  | 27.71      | 0.09           | 0.12                 |
| pain (dx)                                                        | 24.53      | 0.10           | 0.03                 |
| polyethylene glycol 3350 (med)                                   | 24.06      | 0.05           | 0.12                 |
| naloxone (med)                                                   | 21.45      | 0.08           | 0.01                 |
| backache (dx)                                                    | 20.98      | 0.07           | 0.01                 |
| guaifenesin (med)                                                | 20.86      | 0.03           | 0.09                 |
| ondansetron (med)                                                | 19.62      | 0.15           | 0.09                 |
| male sex                                                         | 18.78      | 0.48           | 0.44                 |
| heart failure (dx)                                               | 18.01      | 0.06           | 0.01                 |
| ibuprofen (med)                                                  | 17.98      | 0.07           | 0.02                 |
| malaise (dx)                                                     | 16.23      | 0.02           | 0.06                 |
| glucose (med)                                                    | 15.82      | 0.08           | 0.09                 |
| insulin (med)                                                    | 15.31      | 0.01           | 0.07                 |
| sennosides USP (med)                                             | 14.98      | 0.08           | 0.11                 |
| gastroesophageal reflux disease without esophagitis (dx)         | 14.93      | 0.08           | 0.03                 |
| breathing related sleep disorder (dx)                            | 14.46      | 0.06           | 0.03                 |
| diabetes mellitus without complication (dx)                      | 13.92      | 0.07           | 0.03                 |
| nausea (dx)                                                      | 13.59      | 0.05           | 0.01                 |
| clinical history and observation findings (dx)                   | 13.50      | 0.10           | 0.06                 |
| chlorhexidine (med)                                              | 12.92      | 0.01           | 0.04                 |
| iohexol (med)                                                    | 12.61      | 0.05           | 0.08                 |
| sodium chloride (med)                                            | 12.24      | 0.14           | 0.12                 |
| Am. Soc of anesthesiologists physical status classification (dx) | 11.97      | 0.08           | 0.04                 |
| phenylephrine (med)                                              | 11.71      | 0.06           | 0.03                 |
| increased lipids (dx)                                            | 11.54      | 0.12           | 0.04                 |
| bupivacaine (med)                                                | 10.77      | 0.05           | 0.00                 |
| quetiapine (med)                                                 | 10.67      | 0.02           | 0.05                 |
| iopamidol (med)                                                  | 10.46      | 0.07           | 0.02                 |
| melatonin (med)                                                  | 10.46      | 0.08           | 0.13                 |
| renal failure syndrome (dx)                                      | 10.19      | 0.05           | 0.02                 |
| heart disease (dx)                                               | 10.04      | 0.07           | 0.04                 |
| fentanyl (med)                                                   | 9.43       | 0.13           | 0.06                 |
| diphenhydramine (med)                                            | 9.32       | 0.10           | 0.04                 |
| hypoxemia (dx)                                                   | 9.17       | 0.07           | 0.10                 |
| triamcinolone (med)                                              | 9.10       | 0.04           | 0.02                 |
| deficiency of micronutrients (dx)                                | 8.74       | 0.04           | 0.03                 |
| ergocalciferol (med)                                             | 8.67       | 0.03           | 0.06                 |
| obstructive sleep apnea syndrome (dx)                            | 8.57       | 0.06           | 0.02                 |

# N3C Data Partners

## Data Partners with Released Data

Stony Brook University — U24TR002306 • University of Oklahoma Health Sciences Center — U54GM104938: Oklahoma Clinical and Translational Science Institute (OCTSI) • West Virginia University — U54GM104942: West Virginia Clinical and Translational Science Institute (WVCTSI) • University of Mississippi Medical Center — U54GM115428: Mississippi Center for Clinical and Translational Research (CCTR) • University of Nebraska Medical Center — U54GM115458: Great Plains IDeA-Clinical & Translational Research • Maine Medical Center — U54GM115516: Northern New England Clinical & Translational Research (NNE-CTR) Network • Wake Forest University Health Sciences — UL1TR001420: Wake Forest Clinical and Translational Science Institute • Northwestern University at Chicago — UL1TR001422: Northwestern University Clinical and Translational Science Institute (NUCATS) • University of Cincinnati — UL1TR001425: Center for Clinical and Translational Science and Training • The University of Texas Medical Branch at Galveston — UL1TR001439: The Institute for Translational Sciences • Medical University of South Carolina — UL1TR001450: South Carolina Clinical & Translational Research Institute (SCTR) • University of Massachusetts Medical School Worcester — UL1TR001453: The UMass Center for Clinical and Translational Science (UMCCTS) • University of Southern California — UL1TR001855: The Southern California Clinical and Translational Science Institute (SC CTSI) • Columbia University Irving Medical Center — UL1TR001873: Irving Institute for Clinical and Translational Research • George Washington Children's Research Institute — UL1TR001876: Clinical and Translational Science Institute at Children's National (CTSA-CN) • University of Kentucky — UL1TR001998: UK Center for Clinical and Translational Science • University of Rochester — UL1TR002001: UR Clinical & Translational Science Institute • University of Illinois at Chicago — UL1TR002003: UIC Center for Clinical and Translational Science • Penn State Health Milton S. Hershey Medical Center — UL1TR002014: Penn State Clinical and Translational Science Institute • The University of Michigan at Ann Arbor — UL1TR002240: Michigan Institute for Clinical and Health Research • Vanderbilt University Medical Center — UL1TR002243: Vanderbilt Institute for Clinical and Translational Research • University of Washington — UL1TR002319: Institute of Translational Health Sciences • Washington University in St. Louis — UL1TR002345: Institute of Clinical and Translational Sciences • Oregon Health & Science University — UL1TR002369: Oregon Clinical and Translational Research Institute • University of Wisconsin-Madison — UL1TR002373: UW Institute for Clinical and Translational Research • Rush University Medical Center — UL1TR002389: The Institute for Translational Medicine (ITM) • The University of Chicago — UL1TR002389: The Institute for Translational Medicine (ITM) • University of North Carolina at Chapel Hill — UL1TR002489: North Carolina Translational and Clinical Science Institute • University of Minnesota — UL1TR002494: Clinical and Translational Science Institute • Children's Hospital Colorado — UL1TR002535: Colorado Clinical and Translational Sciences Institute • The University of Iowa — UL1TR002537: Institute for Clinical and Translational Science • The University of Utah — UL1TR002538: Uhealth Center for Clinical and Translational Science • Tufts Medical Center — UL1TR002544: Tufts Clinical and Translational Science Institute • Duke University — UL1TR002553: Duke Clinical and Translational Science Institute • Virginia Commonwealth University — UL1TR002649: C. Kenneth and Dianne Wright Center for Clinical and Translational Research • The Ohio State University — UL1TR002733: Center for Clinical and Translational Science • The University of Miami Leonard M. Miller School of Medicine — UL1TR002736: University of Miami Clinical and Translational Science Institute • University of Virginia — UL1TR003015: iTHRIV Integrated Translational health Research Institute of Virginia • Carilion Clinic — UL1TR003015: iTHRIV Integrated Translational health Research Institute of Virginia • University of Alabama at Birmingham — UL1TR003096: Center for Clinical and Translational Science • Johns Hopkins University — UL1TR003098: Johns Hopkins Institute for Clinical and Translational Research • University of Arkansas for Medical Sciences — UL1TR003107: UAMS Translational Research Institute • Nemours — U54GM104941: Delaware CTR ACCEL Program • University Medical Center New Orleans — U54GM104940: Louisiana Clinical and Translational Science (LA CaTS) Center • University of Colorado Denver, Anschutz Medical Campus — UL1TR002535: Colorado Clinical and Translational Sciences Institute • Mayo Clinic Rochester — UL1TR002377: Mayo Clinic Center for Clinical and Translational Science (CCaTS) • Tulane University — UL1TR003096: Center for Clinical and Translational Science • Loyola University Medical Center — UL1TR002389: The Institute for Translational Medicine (ITM) • Advocate Health Care Network — UL1TR002389: The Institute for Translational Medicine (ITM) • OCHIN — INV-018455: Bill and Melinda Gates

Foundation grant to Sage Bionetworks • The University of Texas Health Science Center at Houston — UL1TR003167: Center for Clinical and Translational Sciences (CCTS) • NorthShore University HealthSystem — UL1TR002389: The Institute for Translational Medicine (ITM) • Weill Medical College of Cornell University — UL1TR002384: Weill Cornell Medicine Clinical and Translational Science Center • Montefiore Medical Center — UL1TR002556: Institute for Clinical and Translational Research at Einstein and Montefiore • Medical College of Wisconsin — UL1TR001436: Clinical and Translational Science Institute of Southeast Wisconsin • George Washington University — UL1TR001876: Clinical and Translational Science Institute at Children's National (CTSA-CN) • Regenstrief Institute — UL1TR002529: Indiana Clinical and Translational Science Institute • Cincinnati Children's Hospital Medical Center — UL1TR001425: Center for Clinical and Translational Science and Training • Boston University Medical Campus — UL1TR001430: Boston University Clinical and Translational Science Institute • The State University of New York at Buffalo — UL1TR001412: Clinical and Translational Science Institute • Brown University — U54GM115677: Advance Clinical Translational Research (Advance-CTR) • Rutgers, The State University of New Jersey — UL1TR003017: New Jersey Alliance for Clinical and Translational Science • Loyola University Chicago — UL1TR002389: The Institute for Translational Medicine (ITM) • New York University — UL1TR001445: Langone Health's Clinical and Translational Science Institute • University of Kansas Medical Center — UL1TR002366: Frontiers: University of Kansas Clinical and Translational Science Institute • Massachusetts General Brigham — UL1TR002541: Harvard Catalyst • University of California, Irvine — UL1TR001414: The UC Irvine Institute for Clinical and Translational Science (ICTS) • University of California, San Diego — UL1TR001442: Altman Clinical and Translational Research Institute • University of California, Davis — UL1TR001860: UC Davis Health Clinical and Translational Science Center • University of California, San Francisco — UL1TR001872: UCSF Clinical and Translational Science Institute • University of California, Los Angeles — UL1TR001881: UCLA Clinical Translational Science Institute • University of Vermont — U54GM115516: Northern New England Clinical & Translational Research (NNE-CTR) Network

#### **Additional Data Partners Who Have Signed a DTA and Whose Data Release is Pending**

The Scripps Research Institute — UL1TR002550: Scripps Research Translational Institute • University of Texas Health Science Center at San Antonio — UL1TR002645: Institute for Integration of Medicine and Science • Yale New Haven Hospital — UL1TR001863: Yale Center for Clinical Investigation • Emory University — UL1TR002378: Georgia Clinical and Translational Science Alliance • University of New Mexico Health Sciences Center — UL1TR001449: University of New Mexico Clinical and Translational Science Center • Stanford University — UL1TR003142: Spectrum: The Stanford Center for Clinical and Translational Research and Education • Aurora Health Care — UL1TR002373: Wisconsin Network For Health Research • Children's Hospital of Philadelphia — UL1TR001878: Institute for Translational Medicine and Therapeutics • Icahn School of Medicine at Mount Sinai — UL1TR001433: ConduITS Institute for Translational Sciences • Ochsner Medical Center — U54GM104940: Louisiana Clinical and Translational Science (LA CaTS) Center • HonorHealth — None (Voluntary) • Arkansas Children's Hospital — UL1TR003107: UAMS Translational Research Institute

# Ethics and Regulatory

The N3C data transfer to NCATS is performed under a Johns Hopkins University Reliance Protocol # IRB00249128 or individual site agreements with NIH.

Use of the N3C data for this study is authorised under the following IRB Protocols:

| Site                         | IRB name                                                                                     | Exempted vs approved | Protocol number |
|------------------------------|----------------------------------------------------------------------------------------------|----------------------|-----------------|
| University of Colorado       | Colorado Multiple Institutional Review Board                                                 | approved             | 21-2759         |
| Johns Hopkins University     | Johns Hopkins Office of Human Subjects Research - Institutional Review Board                 | approved             | IRB00249128     |
| University of North Carolina | University of North Carolina Chapel Hill Institutional Review Board                          | exempt               | 21-0309         |
| Stony Brook University       | Office of Research Compliance, Division of Human Subject Protections, Stony Brook University | exempt               | IRB2021-00098   |
